# Supplementary material for: Assimilating solar-induced chlorophyll fluorescence into theterrestrial biosphere model BETHY-SCOPE: Model description andinformation content
Source: Copernicus journal article supplement (doi:10.5194/gmd-2017-34), 2017-02-21
Supplement: Supplementary file [file gmd-2017-34-SC2-supplement.pdf]

# Assimilating solar-induced chlorophyll fluorescence into the terrestrial biosphere model BETHY-SCOPE v1.0: Model description and information content

Norton Alexander J.<sup>1</sup>, Rayner Peter J.<sup>1</sup>, Koffi Ernest N.<sup>2</sup>, and Scholze Marko<sup>3</sup>

<sup>1</sup>School of Earth Sciences, University of Melbourne, Australia

<sup>2</sup>European Commission Joint Research Centre, Ispra, Italy

<sup>3</sup>Department of Physical Geography and Ecosystem Science, Lund University, Sweden

*Correspondence to:* A.J. Norton (nortona@student.unimelb.edu.au)

**Abstract.** The synthesis of model and observational information using data assimilation can improve our understanding of the terrestrial carbon cycle, a key component of the Earth's climate-carbon system. Here we provide a data assimilation framework for combining observations of solar-induced chlorophyll fluorescence (SIF) and a process-based model to improve estimates of terrestrial carbon uptake, or gross primary production (GPP). We then quantify and assess the constraint SIF provides on the uncertainty of global GPP through model process parameters in an error propagation study. By incorporating one year of satellite SIF observations from the GOSAT satellite, we find that the uncertainty in global annual GPP is reduced by 79%, from  $\pm 13.0 \text{ PgCyr}^{-1}$  to  $\pm 2.8 \text{ PgCyr}^{-1}$ . This improvement is achieved through strong constraint of leaf growth processes and weak to moderate constraint of physiological parameters. We also find that the inclusion of uncertainty in shortwave down radiation forcing has a net-zero effect on uncertainty in GPP when incorporated in the SIF assimilation framework. This study demonstrates the powerful capacity of SIF to reduce uncertainties in process-based model estimates of GPP and the potential for improving our predictive capability of this uncertain carbon flux.

## 1 Introduction

The productivity of the terrestrial biosphere forms a key component of Earth's climate-carbon system. Estimates show that the terrestrial biosphere has removed about one quarter of all anthropogenic  $\text{CO}_2$  emissions thus preventing additional climate warming (Ciais et al., 2013). Much of the interannual variability in atmospheric  $\text{CO}_2$  concentration is also driven by terrestrial productivity. Despite this significance, understanding of underlying mechanisms of terrestrial productivity is still lacking. This manifests in a large uncertainties in the predictive capability of terrestrial productivity and thus, future predictions of  $\text{CO}_2$  and temperature projections (Friedlingstein et al., 2006).

A key challenge is disaggregating the observable net  $\text{CO}_2$  flux into its component fluxes, gross primary production and ecosystem respiration. Gross primary production (GPP) is the rate of  $\text{CO}_2$  uptake through plant photosynthesis and the largest natural surface to atmosphere flux of carbon on Earth (Ciais et al., 2013). Estimating spatiotemporal patterns of GPP at the scales required for global change and modeling studies has, however, proven difficult. This is primarily due to two reasons,

the complexity of the processes involved and the difficulty in observing those processes (Baldocchi et al., 2016; Schimel et al., 2015). Remote sensing observations of solar-induced chlorophyll fluorescence (SIF) offer a novel constraint on GPP and the potential to partly address these two issues (Schimel et al., 2015).

At the leaf scale chlorophyll fluorescence is emitted from photosystems I and II during the light reactions of photosynthesis. These photosystems are pigment-protein complexes that form the reaction centers for converting light energy into chemical energy. It is in photosystem II where photochemistry, the process initiating photosynthetic electron transport and leading to CO<sub>2</sub> fixation, is initiated. The link between chlorophyll fluorescence and photochemistry is confounded by a third key process however, heat dissipation, also termed non-photochemical quenching (NPQ). Both photochemistry and NPQ are regulated processes, responding to changing physiological and environmental conditions. Changes in the rates of photochemistry and NPQ, and electron sinks other than CO<sub>2</sub> fixation, lead to a non-trivial link between chlorophyll fluorescence and photosynthetic rate. However, it is because chlorophyll fluorescence emission is tied in with these physiological processes that it has become such a useful indicator of the actual physiological state at the leaf scale.

At the canopy scale and beyond the link appears simpler, exhibiting ecosystem-dependent linear relationships (Guanter et al., 2013). The slope of this linear relationship can change as the light-use efficiency of either SIF or GPP changes, for example due to water stress (Daumard et al., 2010) or changing light conditions (Yang et al., 2015). SIF also seems to outperform traditional remote sensing methods that use reflectance to derive vegetation indices (e.g. NDVI, EVI) when tracking changes in GPP at this scale (Yang et al., 2015; Walther et al., 2016). This is in part because the SIF emission originates exclusively from plants, thus the retrieval is not contaminated by background materials like soil or snow. It is expected, however, that complicating factors such as the retrieval wavelength, temporal scaling, chlorophyll content, 3-dimensional canopy structure, and stress will also play a role in the GPP-SIF link (Damm et al., 2015; Guanter et al., 2012; Rossini et al., 2015; Zhang et al., 2016). Using high-resolution spectrometers onboard satellites, global maps of SIF have been produced. A number of existing (GOME-2, GOSAT, OCO-2, TROPOMI, SCHIAMACHY) and planned (FLEX, GEOCARB) satellite missions are capable of measuring SIF. Utilizing these remotely-sensed SIF observations directly to track changes in GPP have already proven useful even without the addition of ancillary data or model information (Lee et al., 2013; Parazoo et al., 2013; Walther et al., 2016; Yang et al., 2015).

Data assimilation enables the use of observations and model information together to produce a best estimate of the state and function of the system. This is done by providing a mechanistic model constraint based on underlying processes of terrestrial carbon cycling. Such an approach has been used in the Carbon Cycle Data Assimilation System (CCDAS) to optimize model parameters and constrain uncertainty in terrestrial carbon flux estimates (see Kaminski et al., 2013; Koffi et al., 2013). The CCDAS has ingested observations such as atmospheric CO<sub>2</sub> concentration and/or the fraction of absorbed photosynthetically active radiation (FAPAR), demonstrating the benefit of combining model and observations in a regularized approach (Rayner et al., 2005; Kaminski et al., 2012). The use of SIF observations in such a system may provide a highly useful, complementary constraint on GPP. This may enable estimates of the spatiotemporal patterns of GPP to be improved and the parametric uncertainty of models to be reduced. A key first step toward this is to quantify the potential constraint that SIF provides on GPP and assess which underlying processes provide the constraint, termed here an error propagation study. Here, we utilize a new

model and satellite SIF observations to determine how effectively SIF constrains model process parameter uncertainties and the uncertainty of GPP globally.

## 2 Methods

There is a growing literature around the problem of optimizing parameters in terrestrial biosphere models using various observational data streams. In particular, the CCDAS has provided a systematic framework for which to optimize parameters and subsequently constrain simulated quantities, namely carbon fluxes, using data such as CO<sub>2</sub> concentration and/or FAPAR. Here, the quantity of interest is GPP and the observation is satellite-retrieved SIF.

In order to assimilate such an observation, we require an 'observation operator' that can simulate SIF, ideally providing a process-based relationship between SIF and GPP. There are a few ways one might formulate the observation operator. Evidence shows a strong linear relationship between SIF and GPP at large spatial scales and relatively long temporal scales (Frankenberg et al., 2011; Guanter et al., 2012), suggesting relatively simple scaling between GPP and SIF. However, it is known that the link is more complex than this, and it is expected to differ at finer spatial and temporal scales due to, for example, land surface heterogeneity or the time of day of the measurements. To ensure the model has these capabilities we have opted for a more complex observation operator.

### 2.1 Model Description

In this section we describe the newly developed terrestrial biosphere model for simulating and assimilating SIF. The model is an integration of the existing models BETHY (Biosphere Energy Transfer Hydrology) (Rayner et al., 2005; Knorr et al., 2010) and SCOPE (Soil Canopy Observation, Photosynthesis and Energy fluxes) (Van der Tol et al., 2009) and builds upon the developments by Koffi et al. (2015). The coupling of BETHY and SCOPE enables spatially explicit, plant-type dependent, global simulations of GPP and SIF.

BETHY is a process based terrestrial biosphere model at the core of the Carbon Cycle Data Assimilation System (CCDAS) (Rayner et al., 2005; Scholze et al., 2007). Full model description details can be found elsewhere (e.g. Rayner et al., 2005; Scholze et al., 2007; Knorr et al., 2010). Briefly, BETHY simulates carbon assimilation and plant and soil respiration within a full energy and water balance. The version used here also incorporates a leaf area dynamics module for prognostic leaf area index (LAI) as described in Knorr et al. (2010). This module includes parameters for leaf development, phenology and senescence processes to determine LAI (hereby collectively termed leaf growth) in a scheme that incorporates temperature, water and light limitations on growth and is capable of representing the major global phenology types (Knorr et al., 2010). This scheme also enables the representation of subgrid variability in leaf growth, representing the likely variability in growth triggers across a grid cell and necessary for differentiability between process parameters and state variables. The full BETHY model consists of four key modules: (i) energy and water balance; (ii) photosynthesis; (iii) leaf growth and; (iv) carbon balance. It represents variability in physiology and leaf growth of plant classes by 13 plant functional types (PFTs) (see Table 1) originally

based on classifications by Wilson and Henderson-Sellers (1985). Each model grid cell may consist of up to three PFTs as defined by their grid cell fractional coverage.

**Table 1.** PFTs defined in BETHY and their abbreviations.

| PFT # | PFT Name                             | Abbreviation |
|-------|--------------------------------------|--------------|
| 1     | Tropical broadleaved evergreen tree  | TrEv         |
| 2     | Tropical broadleaved deciduous tree  | TrDec        |
| 3     | Temperate broadleaved evergreen tree | TmpEv        |
| 4     | Temperate broadleaved deciduous tree | TmpDec       |
| 5     | Evergreen coniferous tree            | EvCn         |
| 6     | Deciduous coniferous tree            | DecCn        |
| 7     | Evergreen shrub                      | EvShr        |
| 8     | Deciduous shrub                      | DecShr       |
| 9     | C3 grass                             | C3Gr         |
| 10    | C4 grass                             | C4Gr         |
| 11    | Tundra vegetation                    | Tund         |
| 12    | Swamp vegetation                     | Wetl         |
| 13    | Crops                                | Crop         |

SCOPE is a vertical (1-D) integrated radiative transfer and energy balance model with modules for photosynthesis and chlorophyll fluorescence (Van der Tol et al., 2009). At present it is the only process-based model capable of simulating canopy-scale chlorophyll fluorescence. SCOPE incorporates current understanding of chlorophyll fluorescence processes including canopy radiative transfer, re-absorption of fluorescence within the canopy, and the non-linear relationship between chlorophyll fluorescence quantum yield and other quenching processes (Van der Tol et al., 2009, 2014). Leaf level chlorophyll fluorescence is coupled to the commonly used Farquhar and Collatz models for C3 and C4 photosynthesis, respectively (Van der Tol et al., 2009). A current limitation of SCOPE is that there is no link between leaf level biochemistry and soil moisture. This is compensated by changes in LAI as provided by BETHY.

The canopy radiative transfer and photosynthesis schemes of BETHY have been replaced by the corresponding schemes in SCOPE, including the components required for calculation of chlorophyll fluorescence at leaf and canopy scales. The spatial resolution, vegetation (PFT) characteristics, leaf growth, and carbon balance are handled by BETHY. SCOPE therefore takes in climate forcing (meteorological and radiation data) and LAI from BETHY, and returns GPP. BETHY calculates the canopy water balance, leaf growth, and net carbon fluxes, which will prove useful in future when assimilating other data streams (e.g. atmospheric CO<sub>2</sub> concentration). Importantly, SCOPE provides a process-based link between SIF and GPP allowing the transfer of information from observations of SIF to simulated GPP. Subsequently, information from SIF may also be transferred to carbon fluxes resulting from GPP such as net ecosystem productivity.

## 2.2 Model Process Parameters

In this error propagation system, model process parameter uncertainties are the quantities which SIF constrains. Parameters can be either global or differentiated by PFT. PFT-dependent parameters enable differentiation between physiological and leaf growth traits. Some key parameters for this study such as the maximum carboxylation capacity ( $V_{cmax}$ ) and chlorophyll a/b content ( $C_{ab}$ ) are considered PFT-dependent. From an ecophysiological perspective, there are other parameters from SCOPE that may be considered PFT-dependent such as vegetation height and leaf angle distribution parameters. However, we have assumed them to be global to simplify the problem. GPP is relatively insensitive to these parameters, so this is not expected to impact results. In future it may be worthwhile considering them PFT-dependent anyhow.

We expose 72 parameters from BETHY-SCOPE to the error propagation system (see Table A1). As stated above, each of these is represented by its PDF, assumed to be Gaussian. The mean and standard deviation for the prior parameters is shown Table A1. Choice of the prior mean and uncertainty for parameters follow those used in previous studies (Kaminski et al., 2012; Knorr et al., 2010; Koffi et al., 2015). For new parameters that are not well characterized (e.g. SCOPE parameters) we assign relatively large prior uncertainties, and mean values in line with the default SCOPE parameters and with Koffi et al. (2015). The choice of the prior may be considered important here considering we are using a linear approximation of the model around  $x_0$  and that the model is known to be non-linear. Therefore, sensitivities can differ depending upon the choice of  $x_0$  (Koffi et al., 2015).

There are seven SCOPE parameters exposed, one of which is PFT-dependent. These parameters were chosen due to their importance in simulating SIF or GPP, and to sensitivity tests such as those performed by Verrelst et al. (2015). They include chlorophyll a/b content ( $C_{ab}$ ), leaf dry matter content ( $C_{dm}$ ), leaf senescent material fraction ( $C_s$ ), two leaf distribution function parameters ( $LIDFa$ ,  $LIDFb$ ), vegetation height ( $hc$ ) and leaf width.  $V_{cmax}$  is a parameter shared by BETHY and SCOPE.

## 2.3 Uncertainty Calculations

Past studies utilizing the CCDAS framework have typically formulated the assimilation problem into two stages: model calibration and diagnostic or prognostic simulations (Kaminski et al., 2013). Diagnostic refers to simulations over the calibration period (e.g. Rayner et al., 2005), and prognostic outside of the calibration period (e.g. Scholze et al., 2007). As we are investigating the usefulness of a relatively new observation with a newly coupled model we conduct an investigation into the potential level of calibration and constraint SIF can provide. We therefore formulate the problem into two slightly different stages; (i) optimization of parameter uncertainties and; (ii) projection of uncertainties onto uncertainty in diagnostic GPP. This means that we optimize model parameters and simulated GPP only for their uncertainty and not the absolute quantities. This process of assessing the information content of the SIF observations in uncertainty space is a useful first step towards a full assimilation of the data, allowing us to evaluate the level of constraint SIF is expected to impose on GPP and how that constraint is propagated through the model.

In order to perform this, we utilize a probabilistic framework where the state of information on parameters and observations is expressed by their corresponding probability density functions (PDF). Parameters and observations are therefore described by their mean and uncertainty, and treated as Gaussian. Their respective means are denoted by  $x$  and  $d$ , and their respective covariance matrices by  $C_x$  and  $C_d$ .

5 For linear and weakly non-linear problems we can assume that Gaussian probability densities propagate forward through to Gaussian distributed simulated quantities (Tarantola, 2005). This allows linear error propagation from the input parameters to the model outputs. Estimating posterior uncertainties for these types of problems can be performed independently of the parameter estimation. Therefore, we can calculate the expected posterior covariance matrix following constraint by observations using equation 1 without the need to constrain parameters mean values. This approximation requires a matrix of partial  
10 derivatives of a target quantity with respect to its variables, also called a Jacobian matrix ( $H$ ), for which we calculate around our prior parameter values ( $x_0$ ). This matrix represents the sensitivity of a simulated quantity (e.g. SIF or GPP) to parameters. With this assumption of linearity the choice of  $x_0$  can influence the results considering it determines the point in model space where  $H$  is calculated. Use of prior knowledge on process parameter values helps limit the effect of this problem.

The first step is to utilize uncertainty in the observations to constrain the uncertainty in the process parameters. The information content of the observations and the parameters can be expressed by their respective inverse covariance matrices,  $C_d^{-1}$   
15 and  $C_{x_0}^{-1}$ . Constraint of  $C_{x_0}^{-1}$  using the observations and the Jacobian matrix allows us to calculate the posterior parameter covariance matrix ( $C_{x_{post}}$ ) as in equation 1.

$$C_{x_{post}}^{-1} = C_{x_0}^{-1} + H^T C_d^{-1} H \quad (1)$$

Where  $C_{x_{post}}$  expresses the posterior parameter covariance in matrix form, while  $H$  expresses the Jacobian for SIF and  $H^T$   
20 the Jacobian transposed. Comparing parameter uncertainties in the prior ( $C_{x_0}$ ) and the posterior ( $C_{x_{post}}$ ) allows us to quantify the improvement in parameter precision following the observational constraint.

The observational constraint introduces some correlations into the posterior parameter distributions, thus posterior parameter uncertainties are not wholly independent. Strong correlations in  $C_{x_{post}}$  indicate parameters that cannot be resolved independently in an assimilation while their linear combinations can be. If large enough, these correlations can contribute significantly  
25 to the overall constraint of the target quantity (Bodman, 2013). We calculate correlations in parameters by expressing the covariances as correlations as in equation 2 (see Tarantola, 2005, pg.71). As a result, diagonal elements have a correlation equal to one while off-diagonals elements can range between -1 and 1.

$$R_{i,j} = \frac{C_{i,j}}{\sqrt{C_{i,i}} \sqrt{C_{j,j}}} \quad (2)$$

Using the parameter covariance matrix we can assess how parameter uncertainties project forward through the model onto  
30 uncertainty in GPP using the Jacobian rule for probabilities, the same method outlined in Rayner et al. (2005). This is the second stage of our error propagation problem. Using  $C_{x_0}$  we estimate the prior uncertainty in a vector of simulated target

quantities (i.e. GPP). Similarly, using  $C_{x_{post}}$  we estimate the posterior uncertainty in a vector of simulated target quantities. We calculate the uncertainty covariance of GPP using equation 3.

$$C_{GPP} = H_{GPP} C_x H_{GPP}^T \quad (3)$$

With this we can quantify the improvement in precision of simulated GPP by using either  $C_{x_0}$  or  $C_{x_{post}}$  in equation 3.

- 5 Therefore, using the forward model, a statistical estimation scheme and a set of observational uncertainties we can assess the information content of those observations in the context of the model, it's parameter set, and the quantity of interest taking explicit consideration of uncertainties.

## 2.4 Uncertainty in Observations and Model Forcing Variables

- Observational uncertainties in SIF are calculated from GOSAT satellite observations for 2010. These are interpolated to the  
 10 model grid resolution as demonstrated below. To get the variance of a target grid cell at the model grid resolution (ylat,xlon) we first determine the area-weighted variance of each GOSAT grid cell (ilat,jlon) within that target grid cell. The area-weighting per GOSAT grid cell ( $\hat{Area}_{ilat,jlon}$ ) is calculated as the area divided by the total area of the target grid cell. This enables us to account for different grid cell sizes considering SIF is in physical units per unit area. We then sum the area-weighted variances and scale this uncertainty by the square root of two (see equation 4). Scaling the uncertainty in this way effectively doubles the  
 15 variance in an independent dimension.

$$\sigma_{ylat,xlon}^2 = \sqrt{2} \sum (\hat{Area}_{ilat,jlon}^2 \cdot \sigma_{ilat,jlon}^2) \quad (4)$$

We assume uncorrelated uncertainties in the observations. To ensure our results are not sensitive to the method of calculating the observational uncertainty we conduct some simple sensitivity tests with varied observational uncertainties within the range expected.

- 20 With the use of low-resolution observations the constraint of parameter uncertainties is actually underestimated. This is expected as with a high-resolution setup the number of observations will increase while the number of parameters will remain constant, resulting in stronger uncertainty reductions. Considering this, we also approximate the expected parameter uncertainty reductions from higher resolution observations ( $2^\circ \times 2^\circ$ ). Compared with the low-resolution grid used here ( $7.5^\circ \times 10^\circ$ ), a  $2^\circ \times 2^\circ$  grid has approximately 19-times more observations. Therefore, to estimate the high-resolution observational uncertainty we  
 25 divide the low-resolution GOSAT observational uncertainties by  $\sqrt{19}$ . Using this scaled observational uncertainty estimate, parameter uncertainty and uncertainty in GPP is estimated.

- An additional source of uncertainty in model estimates of GPP is climate forcing. As mentioned by Koffi et al. (2015), uncertainty in forcing such as incoming radiation is not considered in the current CCDAS setup. As might be expected however, it is considered to be an important variable in driving SIF (Verrelst et al., 2015) and GPP. Without consideration of uncertainties in  
 30 forcing variables the uncertainty in GPP may be underestimated. Studies that use process-based models or empirically-derived

relationships do not explicitly consider such uncertainties (e.g. Beer et al., 2010). One such forcing variable is downward shortwave radiation (SWRad). Monthly means of SWRad are suggested to have an uncertainty of  $12 \text{ Wm}^{-2}$  due mostly to uncertainty in clouds and aerosols (Kato et al., 2012). We therefore investigate SWRad uncertainty may be considered in GPP estimates. Furthermore, as SIF responds strongly to SWRad, there is the potential to utilize SIF observations as a constraint on the uncertainty of the forcing. We therefore conduct an additional experiment that incorporates the uncertainty in SWRad in the error propagation system. For this experiment an additional parameter representing SWRad is added to the inversion, which acts as a scaling factor for SWRad globally. We investigate the level of constraint SIF provides on this scaling factor, and the subsequent effects of incorporating uncertainty in SWRad in this inversion on uncertainty in GPP.

## 2.5 Model and Data Setup

In this study BETHY-SCOPE is run for the year 2010 on a computationally fast, low-resolution grid scale ( $7.5^\circ \times 10^\circ$ ), sufficient for investigating error propagation. Climate forcing in the form of daily meteorological input fields for running the model (precipitation, minimum and maximum temperatures, and incoming solar radiation) were obtained from the WATCH/ERA Interim data set (WFDEI Weedon et al., 2014). Photosynthesis and fluorescence are simulated at an hourly time step but forced by the respective monthly mean diurnal cycle. Leaf growth and hydrology are simulated daily.

We focus upon the constraint by SIF measurements at 1:00 p.m. local time as it closely corresponds to the local overpass time of the SIF-observing satellites GOSAT and OCO-2. However, we also investigate the effect of using alternative SIF-observing times (e.g. the GOME-2 satellite overpass time) and multiple observing times simultaneously on the constraint of GPP. SIF is simulated at 755 nm, the wavelength corresponding to the GOSAT retrieval frequency and near to the OCO-2 retrieval frequency (757 nm).

## 3 Results

### 3.1 Parameter Uncertainties

A key metric for assessing the relative uncertainty reduction, or 'constraint', is defined as  $1 - \sigma_{\text{posterior}} / \sigma_{\text{prior}}$ . The constraint for all 72 parameters following constraint by SIF is shown in Figure 1 and in Table A1. We define weak, moderate and strong constraint as the relative uncertainty reduction from 1-10%, 10-50%, and >50%, respectively.

Parameters describing leaf composition ( $C_{ab}$ ,  $C_{dm}$ ,  $C_{sm}$ ) generally achieve strong constraint from SIF. For eleven of the thirteen  $C_{ab}$  parameters the uncertainty is strongly constrained, between about 50% and 85%. SIF is highly sensitive to  $C_{ab}$  and we assign a relatively large prior uncertainty on these parameters, so a considerable constraint is expected. For the tropical broadleaved evergreen tree PFT however, the constraint on  $C_{ab}$  is much lower at 8%. For other leaf composition parameters  $C_{dm}$  and  $C_{sm}$  SIF constrains the uncertainty by 2% and <1% respectively.

Varied constraint is seen for the leaf growth parameters (parameters 37-53 in Table A1) that control phenology and leaf area. Four out of the seventeen leaf growth parameters exhibit strong uncertainty reductions. These parameters pertain to a variety



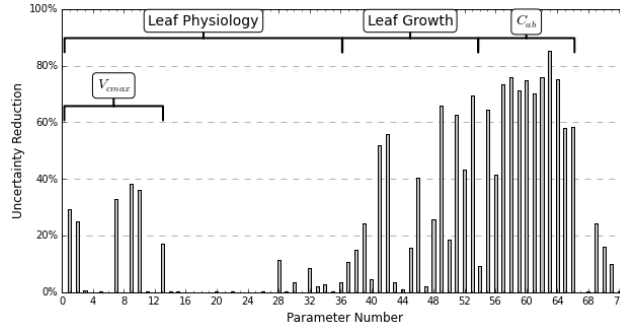

**Figure 1.** Relative reduction in uncertainty ( $1\sigma$ ) for BETHY-SCOPE model process parameters following SIF constraint. The parameters are defined in Table A1.

of processes including the temperature at leaf onset, day length at leaf shedding, leaf longevity, and the expected length of dry spell before leaf shedding ( $\tau_W$ ) (see Table 1). The parameter  $\tau_W$  is important in controlling leaf area and it sees strong constraint from SIF, from 44-69% depending upon which class of PFT it pertains to. For the parameters that are PFT-specific, there is generally a larger constraint seen when they relate to the C3Gr, C4Gr and crops. For example  $\tau_W$  for grasses and crops ( $\tau_W^{Gr}$ ) is constrained by 70%.

Leaf physiological parameters (parameters 1-36 in Table A1) see a weak to moderate level of constraint. Of particular importance for simulating GPP is the PFT-specific parameter  $V_{cmax}$ . Constraint on  $V_{cmax}$  varies from <1% up to 30% depending upon the PFT of interest. Six PFTs that, combined, represent about 70% of the land surface have their  $V_{cmax}$  parameters constrained by >10%. Some global physiological parameters receive a weak constraint from SIF. However, for most of these ( $E_{Ra}$ ,  $E_{KO}$ ,  $E_k$ ,  $K_O$ ,  $a_{J,V}$ ) there is only a minor reduction of uncertainty as SIF is weakly sensitive to them. The parameters that do see a weak constraint include the Michaelis-Menton enzyme kinetics constant for carboxylation ( $K_C$ ; 2.3%), the corresponding activation energy for carboxylation ( $E_{K_C}$ ; 2.5%) and for  $V_{cmax}$  ( $E_{V_{cmax}}$ ; 7.6%), and quantum efficiency parameters ( $\alpha_q$ ; 5.2% and  $\alpha_i$ ; 1.1%).

Global canopy structure parameters (parameters 69-72 in Table A1) also see a weak to moderate constraint from SIF. In particular the structural parameters  $LIDFa$  and  $LIDFb$  see uncertainty reduced by 23% and 16%, respectively. The parameters for vegetation height and leaf width, which are used to calculate the fluorescence "hot-spot" variable (see Van der Tol et al., 2009), are constrained by 9% and <1%, respectively.

Parameters that pertain to more dominant PFTs in terms of land surface coverage (e.g. C3 grass) tend to see stronger uncertainty reductions. This is due to them being exposed to more SIF observations.

As expected, with high-resolution observations there is stronger constraint of parameter uncertainties (see Table A1). Strong constraint is seen for 27 parameters compared to 16 in the low-resolution tests. This includes strong constraint of five  $V_{cmax}$  parameters, and moderate constraint of seven other physiological parameters.

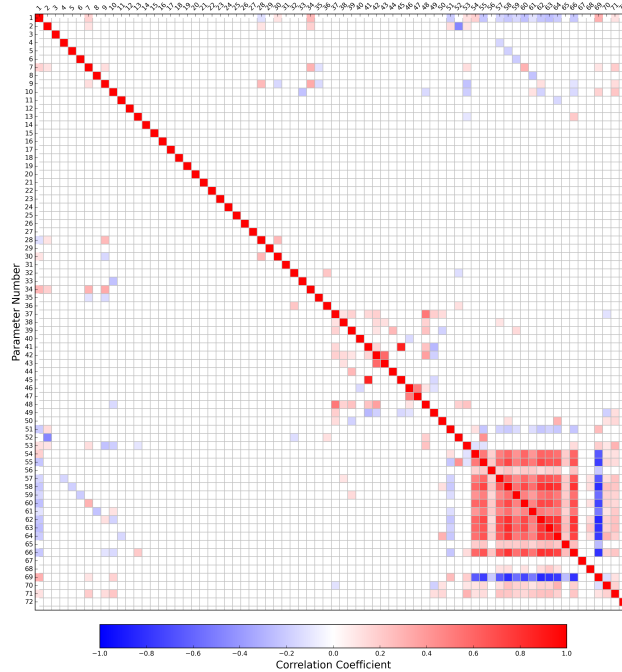

**Figure 2.** Correlations in posterior parameter covariance matrix ( $C_{x_{post}}$ ). Only values with an absolute correlation coefficient  $>0.1$  are shown.

With the observational constraint correlations are introduced into the posterior parameter distributions. We assess these correlations using 2, shown in Figure 2. We find strong ( $R \geq 0.5$ ) positive correlations between nine of the PFT-specific chlorophyll parameters. These are also negatively correlated the leaf angle distribution parameter  $LIDFa$ . Thus during the assimilation only the sum of  $C_{ab}$  and  $LIDFa$  can be resolved, not their individual values. Some leaf growth parameters are also significantly correlated, including  $T_\phi$  with  $T_r$  and  $\xi$  with  $\tilde{\Lambda}$ .

### 3.2 Uncertainty in GPP

To assess the constraint imposed by SIF on simulated GPP we compare the prior and posterior uncertainty in GPP as calculated using equation 3. Similar to the assessment of parameter uncertainty reductions, to assess the constraint of SIF on GPP we use a metric that measures the relative uncertainty reduction in  $1\sigma$  from the prior to the posterior.

- 10 Utilizing SIF observations at 1:00 p.m. results in the uncertainty in global annual GPP to decrease from  $13.0 \text{ PgCyr}^{-1}$  to  $2.8 \text{ PgCyr}^{-1}$ , constituting a 79% reduction of the prior uncertainty. Spatially, the prior uncertainty in GPP varies across the globe, with particularly large uncertainties in regions with high productivity as might be expected (Figure 4). In the posterior, it is clear that uncertainty in GPP is strongly reduced across the globe (Figure 5). The relative uncertainty reduction (Figure 6) appears to show smaller constraint of uncertainty in the boreal regions, however this is because prior uncertainty is already relatively

low (Figure 4). As with the parameter uncertainty reductions, we expect that with the use of higher resolution observations there will be stronger constraint of the uncertainty. When utilizing the high-resolution ( $2^\circ \times 2^\circ$ ) observational uncertainties, uncertainty in global GPP is reduced to  $1.3 \text{ PgCyr}^{-1}$ , constituting a 90% reduction in uncertainty relative to the prior.

To assess which parameters contribute to the uncertainty in GPP for the prior and posterior, we can conduct linear analysis of the uncertainty contributions. Typically this technique can only be used for the prior as the correlations in posterior parameter uncertainties, excluded from the linear analysis, also contribute toward the overall constraint. However, we find that the contribution of these correlations to the constraint of GPP is small ( $0.12 \text{ PgCyr}^{-1}$  or  $<1\%$ ), thus we can assume the linear analysis technique holds for the posterior as well. This finding is supported by the correlation analysis in posterior parameter uncertainties which showed few significant correlations in parameters relevant for GPP. This result is encouraging as it indicates that the parameters in a SIF assimilation system contributing most to the constraint of GPP are capable of being resolved independently.

Using linear analysis of the uncertainty we find that uncertainty in global annual GPP in the prior and posterior stem from different processes. For the prior we see that the uncertainty in GPP is dominated, at 91%, by parameters describing leaf growth processes. Of these, a single parameter,  $\tau_W$  for C3 grass, C4 grass and crops ( $\tau_W^{Gr}$ ) makes up 82% of the uncertainty in global annual GPP. Parameters representing physiological processes account for about 6% of prior uncertainty, most of which stem from the  $V_{cmax}$  parameters. Parameters for  $C_{ab}$  only account for 2.5% of the uncertainty, as may be expected considering GPP is relatively insensitive to  $C_{ab}$ .

For the posterior, following an overall reduction of the uncertainty in GPP, uncertainty is dominated by parameters representing physiological processes. Physiological parameters account for 53% of the uncertainty in posterior annual GPP, with  $V_{cmax}$  parameters alone accounting for 40%. The relative contribution by leaf growth parameters is reduced to 45%, and for  $\tau_W^{Gr}$  to 25%. For  $C_{ab}$  the relative contribution is smaller than the prior at 1.3%. This shift in which parameters contribute to uncertainty in GPP between the prior and the posterior demonstrates how effectively SIF constrains leaf growth processes. Although there are uncertainty reductions in physiological parameters, the increase in the relative uncertainty contribution of these processes in the posterior GPP demonstrates the limitations in SIF constraining leaf physiology.

Regionally, we split the land into three regions, the Boreal region (above  $45^\circ$  North), the Temperate North ( $30^\circ$  to  $45^\circ$  North) and the Tropics ( $30^\circ$  South to  $30^\circ$  North). SIF constraint on GPP varies substantially across different regions of the globe, with relative uncertainty reductions of 48%, 82%, and 79% for the Boreal, Temperate North and Tropics regions, respectively. For the Boreal and Temperate North regions there are also seasonal differences in the constraint SIF provides. This is caused by seasonal dependencies in the sensitivity of SIF and GPP to certain processes (e.g. leaf development versus leaf senescence) as well as seasonal differences in the density of observations in this region. There are far fewer GOSAT satellite observations during Boreal autumn and winter, thus there are fewer observations to constrain processes controlling GPP during this time.

During the start of the growing season photosynthetic rate constants ( $V_{cmax}$ ) play a larger role whereas later in the growing season during the warmest months water limitation on leaf area (via  $\tau_W^{Gr}$ ) of grasses plays a larger role. Therefore in the Boreal region, where the strongest seasonality in constraint is seen, from July through to January SIF constrains GPP by  $>60\%$ . Uncertainty in GPP during these months is dominated by the leaf growth parameters  $\tau_W^{Gr}$  and  $k_L$  along with  $C_{ab}$  (for EvCn) all

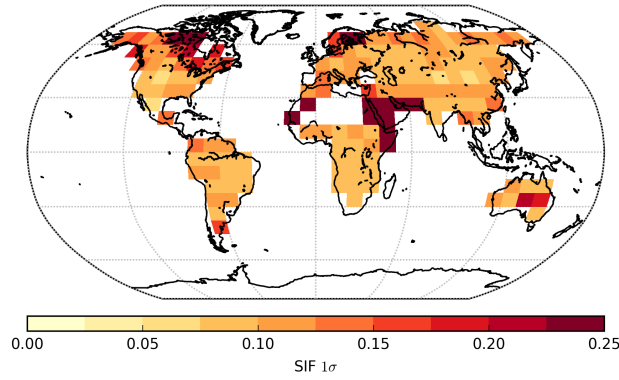

**Figure 3.** SIF observational uncertainty ( $1\sigma$ ) interpolated from GOSAT SIF observations for 2010.

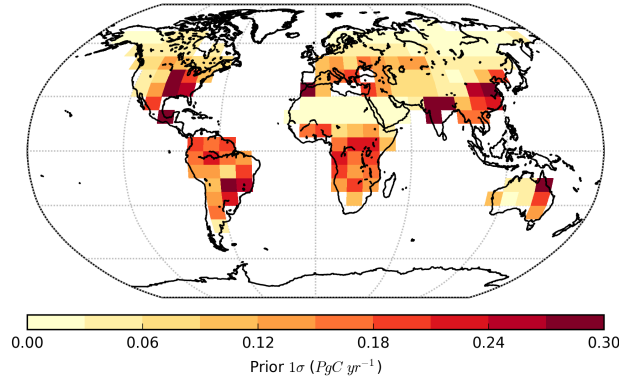

**Figure 4.** Prior uncertainty in annual GPP ( $1\sigma$ ).

of which receive considerable constraint from SIF. From February to June however, SIF constrains GPP by less than 50%, as a large proportion of the uncertainty is made up by the less constrained  $V_{cmax}$  parameters. Following SIF constraint, uncertainty in Boreal GPP stems mostly from uncertainty in  $V_{cmax}$ , particularly for the EvCn PFT. Similar differences between seasonal constraint is seen for the Temperate North, albeit not as exaggerated with SIF-constraint ranging between 74% and 87%.

- 5 For the Tropics uncertainty reduction in GPP is about 80% across the year. Uncertainty in the prior is dominated by the  $\tau_W$  parameters controlling water-limited leaf area. SIF constraint is primarily propagated through these parameters onto GPP resulting in a well-constrained posterior with a  $1\sigma$  of 1.6 PgC yr<sup>-1</sup> on the Tropics annual GPP. Although moderate constraint is seen in the key PFT-specific parameter  $V_{cmax}$  for the dominant Tropical PFTs, in the posterior these parameters make up roughly 35% of the uncertainty in annual GPP.

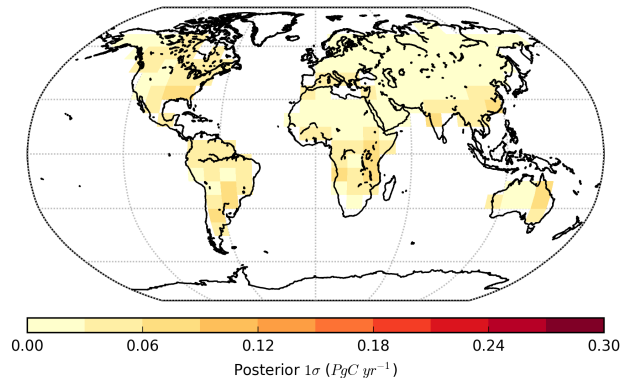

**Figure 5.** Posterior uncertainty in annual GPP ( $1\sigma$ ).

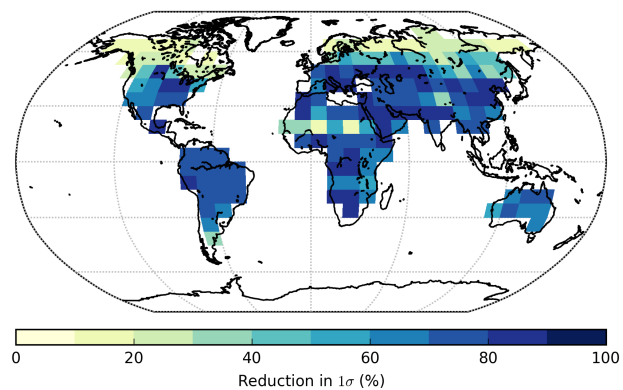

**Figure 6.** Relative uncertainty reduction in annual GPP from prior to posterior.

### 3.3 Diurnal SIF Constraint

With this setup it is possible to test how the SIF-constraint on GPP might change with alternative observational times. Considering this, we test how the constraint on GPP changes when assimilating observations of SIF from alternative times of the day, assuming the same number of observations and the same observational uncertainty as used above. From this we see that

5 different observing times yield differences in the posterior uncertainty and the relative constraint of GPP (see Figure 7). The constraint on global annual GPP when using SIF-observing times between 9:00 a.m. and 3:00 p.m. is quite similar, with the posterior uncertainty in global annual GPP ranging from  $2.7 \text{ PgCyr}^{-1}$  (constraint of 79%) to  $3.4 \text{ PgCyr}^{-1}$  (constraint of 74%). The most significant constraint on GPP is obtained when using SIF observations at between 11:00 or 13:00, nearest to the peak in the diurnal cycle of both GPP and SIF.

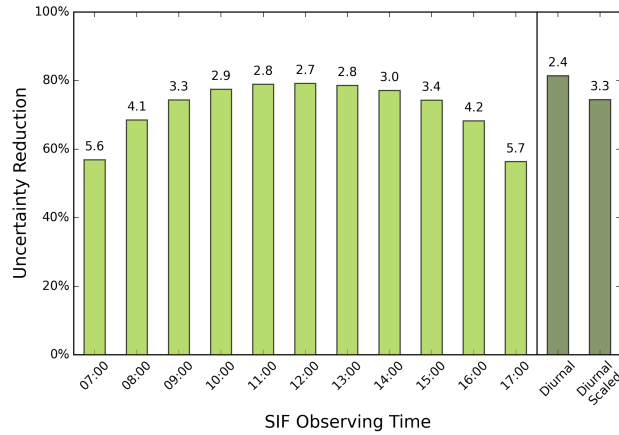

**Figure 7.** Relative uncertainty reduction in global annual GPP for different observing times and the two diurnal cycle configurations. Values at the top of the bars correspond to the posterior uncertainty ( $1\sigma$ ) in global annual GPP.

We also test the effect of utilizing SIF measurements at multiple times of the day simultaneously. We select the times 8:00 a.m., 12 noon, and 4:00 p.m., replicating a theoretical geostationary satellite. For this experiment we first test the effect of increasing the number of observations by a factor of three, assuming the same uncertainty for the three observation times. Second, we increase the number of observations by a factor of three, but scale the variance of these observations by one third. Using this second test we can assess whether differences in parameter sensitivities of SIF and GPP at the different times of the day adds value in the overall constraint.

Using a diurnal cycle of observations results in a posterior uncertainty of  $2.4 \text{ PgCyr}^{-1}$ , or a relative reduction of 81% as in Figure 7. This is an extra 2% constraint on the uncertainty in GPP compared with observations at 12:00 noon alone. If we use a diurnal cycle of observations with scaled uncertainties, we see a slightly reduced constraint on GPP where the posterior uncertainty is  $3.3 \text{ PgCyr}^{-1}$  equivalent to a 74% reduction in uncertainty (Figure 7). Therefore the difference in model sensitivities across the diurnal cycle is not sufficient to outweigh having additional observations at midday. The constraint is worse with these scaled observational uncertainties as we are effectively removing some useful observational information at midday, which is the most sensitive time of day, and getting extra observational information at the lower-sensitivity times of 8:00 a.m. and 4:00 p.m..

### 3.4 Incorporating Uncertainty in Radiation

In order to assess the effects of incorporating uncertainty in SWRad we conduct three experiments. First is a control run, equivalent to using SIF at 1:00 p.m. as before. Second includes uncertainty in SWRad by adding it into the posterior uncertainty calculation, what might be done normally when accounting for uncertainty in forcing. Third is incorporating uncertainty in

SWRad into the error propagation system with SIF, effectively treating it as a model parameter such that its uncertainty may be constrained.

Including the uncertainty in SWRad in the calculation of posterior uncertainty in GPP results in an additional 0.02 PgCyr<sup>-1</sup> to the prior uncertainty in global annual GPP. This is a small effect relative to the parametric uncertainties. Moreover, if we incorporate SWRad uncertainty into the error propagation system we see that this additional uncertainty is mitigated by the SIF constraint. With SWRad uncertainty included, the posterior uncertainty in GPP remains at 2.8 PgCyr<sup>-1</sup>, equivalent to the case without accounting for uncertainty in SWRad, with both providing about a 78.6% relative reduction in uncertainty of GPP. This mitigation of the additional uncertainty from SWRad is possible because both SIF and GPP are strongly sensitive to it, thus any constraint on SWRad from SIF is also propagated through to GPP.

**Table 2.** Experiments with SWDown Uncertainty.

| Experiment          | Prior<br>GPP 1 $\sigma$ | Posterior<br>GPP 1 $\sigma$ | Relative<br>Un-<br>certainty<br>Reduction |
|---------------------|-------------------------|-----------------------------|-------------------------------------------|
| Control             | 13.04                   | 2.79                        | 78.59%                                    |
| Control+SWRad       | 13.05                   | 2.87                        | 78.01%                                    |
| With SIF Constraint | 13.05                   | 2.80                        | 78.57%                                    |

We find that SIF constrains the SWRad uncertainty by about 28%. This gain in information on SWRad naturally results in less information being available for other parameters. The relative uncertainty reduction for most parameters decreases by just a few percent. For example most  $C_{ab}$  parameters see a decrease in constraint of around 1%, and five of the  $V_{cmax}$  parameters between 0.5-3%. With GPP exhibiting low sensitivity to  $C_{ab}$  parameters and strong sensitivity to SWRad, the transfer of information from  $C_{ab}$  to SWRad results in an overall mitigated effect of SWRad uncertainty on GPP.

#### 4 Discussion

The results presented show that with one year of satellite SIF data observed at the GOSAT and OCO-2 satellite overpass time and SIF retrieval wavelength we can constrain a large portion of the BETHY-SCOPE parameter space and ultimately constrain global annual GPP to  $\pm 2.8$  PgCyr<sup>-1</sup>. This constitutes an uncertainty reduction of 79% in global annual GPP relative to the prior. Although this data-driven constraint is model dependent, it is much improved on the often-reported uncertainty of  $\pm 8$  PgCyr<sup>-1</sup> from the empirical-model-based upscaled product of Beer et al. (2010). We note that our analysis is an underestimate of the constraint, as it is performed with low-resolution observations. We demonstrated, however, that with the use of higher resolution observations the constraint gets stronger. Similarly, with a longer time-series of data there will be stronger constraint. This occurs because the number of observations increases while the number of parameters remain constant.

With an approximation of observational uncertainty in higher resolution observations ( $2^\circ \times 2^\circ$ ) we see that uncertainty in global annual GPP is reduced by 90% to  $1.3 \text{ PgCyr}^{-1}$ .

The constraint on global GPP is similar when assimilating SIF at any time between 9:00 a.m. and 3:00 p.m.. Assimilating observations at the daily maximum of SIF and GPP provides the strongest constraint as both quantities exhibit the strongest parameter sensitivities at these times. Depending upon the state of the vegetation and the environmental stress conditions, maximum SIF and GPP may occur anywhere between mid-morning and early afternoon. Therefore, we expect that effective use of different satellite-retrieved SIF observations for assimilation studies will depend not so much on their observing time but more on the spatiotemporal resolution, measurement precision, and subsequent uncertainty. A confounding factor to this expectation is the uncertain role of physiological stress on the diurnal cycle of SIF and GPP and subsequent modeling capabilities of these processes.

Multiple studies have shown that various forms of environmental stress result in downregulation of photosystem II and changes in the fluorescence yield, particularly evident across the diurnal cycle (Carter et al., 2004; Daumard et al., 2010; Flexas et al., 1999, 2000, 2002; Freedman et al., 2002). By ingesting SIF observations at multiple times of the day we hypothesized that there could be improvements in the overall constraint on GPP as the SIF observations would capture the vegetation in different states of stress. However, we saw only minor improvements in the constraint and less constraint if we assumed no additional information in the observations (i.e. with scaled uncertainty). Thus the difference in model parameter sensitivities of SIF and GPP at other times during the diurnal cycle were not sufficient to add value to the constraint. This is likely due to limitations of the model however. Although BETHY-SCOPE simulates light-induced downregulation of PSII, there is no mechanism present to simulate other forms of stress that might be expected to emerge across the diurnal cycle. However, even with a perfect model, the spatial footprint and spatiotemporal averaging of satellite observations may smooth over stress signals. Considering these factors, there is no technical reason, other than computational requirements, why a data assimilation system such as this could not ingest individual soundings of SIF observations to remedy the problem.

The constraint of SIF on GPP occurs via multiple processes including leaf growth, leaf composition, physiology, and canopy structure. For the prior, uncertainty in global GPP is dominated by leaf growth processes. There is a clear and direct link between leaf growth processes and GPP (Baldocchi, 2008) as the dynamics of leaf area influences canopy APAR which in turn strongly influences GPP. Leaf growth parameter uncertainties are relatively large in the prior, with coefficients of variation up to 50%. It is perhaps no surprise then that these parameters project a large uncertainty onto GPP. Regardless, both GPP and SIF respond similarly to the leaf growth parameters so information from observations of SIF can provide direct constraint on GPP in this way. Many leaf growth parameters, particularly for grasses, crops, and deciduous trees and shrubs, receive constraint of >40% from SIF thus the overall contribution of leaf growth parameters in the posterior is considerably reduced.

Of particular importance is the parameter describing water limitation on leaf growth ( $\tau_W$ ), which accounts for about 80% of the prior uncertainty in global GPP. While many of the leaf growth parameters determine phenological processes such as temperature or light dependent growth triggers (i.e. temporal evolution of leaf area),  $\tau_W$  is the only free parameter controlling leaf area other than intrinsic maximum LAI ( $\tilde{A}$ ) (Knorr et al., 2010). Considering this, and that we assume little prior knowledge on  $\tau_W$  (i.e. it is highly uncertain), it projects a considerable uncertainty onto GPP.



At the global scale,  $\tau_W$  for crops, C3 grasses and C4 grasses ( $\tau_W^{Gr}$ ) is particularly important. The prevalence of these three PFTs across all biomes means they can have strong effect at the global scale. Combined, these PFTs cover about 47% of the land surface and account for 58% of global annual GPP in the present model setup. Although this contribution to global GPP may seem high, it is based on the prior estimate. In a recent study by Scholze et al. (2016) where atmospheric CO<sub>2</sub> concentration and SMOS soil moisture were assimilated into BETHY, the posterior value for  $\tau_W^{Gr}$  shifted approximately three standard deviations away from the prior, the result of which would have been a large change in the GPP of these PFTs. This exposes a limitation to the present study as we can predict and quantify how SIF will constrain the uncertainty of process parameters and GPP, but we cannot predict how their values will change.

The constraint SIF provides on leaf growth processes is also perhaps feasible from other remote sensing products such as FAPAR (e.g. Kaminski et al., 2012). A direct comparative study would be required to assess the advantages and disadvantages of each observational constraint. Nevertheless, issues arise with these alternative observations when observing dense canopies (Yang et al., 2015) or vegetation with high photosynthetic rates such as crops as they are near saturation (Guanter et al., 2014). Information on maximum potential LAI ( $\tilde{A}$ ) and parameters pertaining to understorey shrubs and grasses are therefore also limited (Knorr et al., 2010). A strong benefit of SIF is that it shows minimal saturation effects (e.g. Yang et al., 2015), especially beyond 700 nm where most current satellite SIF measurements are made.

The strong constraint SIF provides on leaf growth processes indicates that it is likely to provide improved monitoring of key phenological processes such as the timing of leaf onset, leaf senescence and growing season length. This will be highly useful in interpreting results from a full assimilation with SIF as the posterior process parameter values can be compared with independent ecophysiological data, taking consideration of spatial scale issues.

Beyond observing LAI dynamics SIF can also provide critical insights into physiological processes (e.g. Walther et al., 2016). We see here that SIF provides weak to moderate constraint on a range of physiological parameters, including up to 30% constraint on  $V_{cmax}$  parameters. The limited constraint on these parameters results in the posterior being dominated by uncertainty in the parameters representing physiological processes. This is in line with Koffi et al. (2015) considering they found limited sensitivity of SIF to  $V_{cmax}$ . We note that under certain conditions, where other key variables are well known, SIF can be used to retrieve  $V_{cmax}$  (Zhang et al., 2014). The ability of SIF to inform on physiological processes at all will provide researchers with a powerful new insight into spatiotemporal patterns of GPP. As was shown by Walther et al. (2016) and Yang et al. (2015) this is particularly important for evergreen vegetation as changes in photosynthetic activity are not always reflected by changes in traditional vegetation indices.

Chlorophyll content here constitutes a classic nuisance variable. A nuisance variable is one that is not perfectly known, impacts the observations we wish to use but not the target variable (Rayner et al., 2005). However, exploiting the well-documented correlation between leaf nitrogen content,  $V_{cmax}$ , and  $C_{ab}$  may help curtail this problem (Evans, 1989; Kattge et al., 2009). Houborg et al. (2013) demonstrated that by including a semi-mechanistic relationship between these variables in the Community Land Model and using satellite-based estimates of chlorophyll to derive  $V_{cmax}$ , there is significant improvement in predictions of carbon fluxes over a field site. Implementing such a semi-mechanistic link in a data assimilation system would enable the strong constraint that SIF provides on  $C_{ab}$  to feed more directly onto GPP. However, in this study it is assumed  $C_{ab}$

and  $V_{cmax}$  can be resolved independently which may not be the case considering ecophysiological studies have shown the two parameters are commonly correlated.

Almost all terrestrial carbon cycle models use down-welling radiation at the Earth's surface as an input variable. Any uncertainty in this forcing will translate into uncertainty in carbon fluxes including GPP, and few studies consider such uncertainties.

5 At the global scale, Kato et al. (2012) used a perturbation study, along with modeled irradiance and remotely sensed measurements to compute an uncertainty ( $1\sigma$ ) of  $12 \text{ Wm}^{-2}$  for monthly gridded downward shortwave radiation over the land. We considered this uncertainty by incorporating it into the error propagation system with SIF. By including this uncertainty as the prior uncertainty in GPP increases, however, when incorporating it in with SIF the effect is mitigated. SIF can therefore provide useful information on the SWRad forcing via a data assimilation system. The consideration of uncertainties in forcing  
10 variables such as SWRad on terrestrial carbon fluxes is important when estimating the uncertainty in GPP. However, the effect on uncertainty in GPP may be strongly reduced by using SIF observations.

The results presented here demonstrate how SIF observations may be utilized to optimize a process-based terrestrial biosphere model and constrain uncertainty of simulated GPP. These results are, however, model dependent. The assumption is that the model simulates the most important processes driving SIF and GPP. Some key, remaining unknowns include how processes  
15 such as environmental stress, 3-dimensional canopy structure effects, or nitrogen cycling may affect the SIF signal. As better understanding is developed on the role that these processes play, modeling capabilities can also be improved. Additionally, a different set of prior parameter values will alter the results due to changes in the Jacobian. Use of prior knowledge, based on ecophysiological data and its probable range, is critical to curtail this problem. The choice of how to spatially differentiate the parameters will also affect results (Ziehn et al., 2011). Selecting an optimal parameter set that has the fewest degrees of  
20 freedom, yet provides the best fit to the observational data is outside the scope of this study however. Implementation of a parameter estimation scheme in a full data assimilation system with SIF and other observational data will help address these challenges. Earlier work by Koffi et al. (2015) demonstrated that the model can simulate the patterns of observed satellite SIF quite well, indicating the model can ingest the data. Further work will be needed to assess how well the model can simulate patterns of SIF with an optimized, realistic parameter set.

## 25 5 Conclusions

We assessed the ability of satellite SIF observations to constrain uncertainty in model parameters and uncertainty in spatiotemporal patterns of simulated GPP using a process-based terrestrial biosphere model. The results show that there is strong constraint of parametric uncertainties across a wide range of processes including leaf growth dynamics and leaf physiology when assimilating just one year of SIF observations. Combined, the SIF constraint on parametric uncertainties propagates  
30 through to a strong reduction of uncertainty in GPP. The prior uncertainty in global annual GPP is reduced by 79% from  $13.0 \text{ PgCyr}^{-1}$  to  $2.8 \text{ PgCyr}^{-1}$ . Although model dependent, this result demonstrates the potential of SIF observations to improve our understanding of GPP. We also showed that a data assimilation framework with error propagation such as this allows us to account for uncertainty in model forcing such as SWRad. Surprisingly, by including it into this framework with SIF observa-

tions there is a net-zero effect on uncertainty in GPP due to the sensitivity of both SIF and GPP to radiation. This study is a crucial first step toward assimilating satellite SIF data to estimate spatiotemporal patterns of GPP. With the addition of other observational constraints such as atmospheric CO<sub>2</sub> concentration or soil moisture there is also the possibility of accurately disaggregating the net flux into its component fluxes, GPP and ecosystem respiration. Indeed, with these additional, complementary observations of the terrestrial biosphere further constraint could be gained as other regions of parameter space may be resolved (Scholze et al., 2016).

## **6 Code availability**

The BETHY-SCOPE model code is available in the repository at <https://github.com/NortonAlex/BETHY-SCOPE-Interactive-Phenology>. The GOSAT satellite SIF data used in this paper is from the ACOS project (version b35).

## Appendix A

**Table A1.** BETHY-SCOPE process parameters along with their prior and optimized uncertainties following SIF constraint. Uncertainty reduction is reported for the error propagation with low-resolution and high-resolution SIF observations.

| #  | Parameter           | Prior<br>Mean | Prior<br>Uncertainty | Uncertainty<br>Low-Res. | Reduction (%) | Uncertainty<br>High-Res. | Reduction (%) |
|----|---------------------|---------------|----------------------|-------------------------|---------------|--------------------------|---------------|
| 1  | $V_{cmax}$ (TrEv)   | 60            | 12                   | 29.3                    |               | 53.5                     |               |
| 2  | $V_{cmax}$ (TrDec)  | 90            | 18                   | 25.0                    |               | 52.6                     |               |
| 3  | $V_{cmax}$ (TmpEv)  | 41            | 8.2                  | 0.8                     |               | 10.8                     |               |
| 4  | $V_{cmax}$ (TmpDec) | 35            | 7                    | <0.1                    |               | 0.5                      |               |
| 5  | $V_{cmax}$ (EvCn)   | 29            | 5.8                  | 0.2                     |               | 3.4                      |               |
| 6  | $V_{cmax}$ (DecCn)  | 53            | 10.6                 | <0.1                    |               | 0.2                      |               |
| 7  | $V_{cmax}$ (EvShr)  | 52            | 10.4                 | 32.8                    |               | 54.3                     |               |
| 8  | $V_{cmax}$ (DecShr) | 160           | 32                   | <0.1                    |               | 0.6                      |               |
| 9  | $V_{cmax}$ (C3Gr)   | 42            | 8.4                  | 38.4                    |               | 57.1                     |               |
| 10 | $V_{cmax}$ (C4Gr)   | 8             | 1.6                  | 36.3                    |               | 62.9                     |               |
| 11 | $V_{cmax}$ (Tund)   | 20            | 4                    | 0.2                     |               | 3.8                      |               |
| 12 | $V_{cmax}$ (Wetl)   | 20            | 4                    | <0.1                    |               | 0.1                      |               |
| 13 | $V_{cmax}$ (Crop)   | 117           | 23.4                 | 17.0                    |               | 49.5                     |               |
| 14 | $a_{J,V}$           | 1.96          | 0.098                | 0.2                     |               | 2.5                      |               |
| 15 | $a_{J,V}$           | 1.99          | 0.0995               | 0.1                     |               | 1.0                      |               |
| 16 | $a_{J,V}$           | 2.00          | 0.1                  | <0.1                    |               | <0.1                     |               |
| 17 | $a_{J,V}$           | 2.00          | 0.1                  | <0.1                    |               | <0.1                     |               |
| 18 | $a_{J,V}$           | 1.79          | 0.0895               | <0.1                    |               | <0.1                     |               |
| 19 | $a_{J,V}$           | 1.79          | 0.0895               | <0.1                    |               | <0.1                     |               |
| 20 | $a_{J,V}$           | 1.96          | 0.098                | 0.1                     |               | 2.1                      |               |
| 21 | $a_{J,V}$           | 1.66          | 0.083                | <0.1                    |               | <0.1                     |               |
| 22 | $a_{J,V}$           | 1.90          | 0.095                | 0.1                     |               | 1.8                      |               |
| 23 | $a_{J,V}$           | 140e-6        | 28e-6                | <0.1                    |               | <0.1                     |               |
| 24 | $a_{J,V}$           | 1.85          | 0.0925               | <0.1                    |               | <0.1                     |               |
| 25 | $a_{J,V}$           | 1.85          | 0.0925               | <0.1                    |               | <0.1                     |               |
| 26 | $a_{J,V}$           | 1.88          | 0.094                | 0.2                     |               | 1.9                      |               |
| 27 | $E_{R_d}$           | 45000         | 2250                 | <0.1                    |               | 0.3                      |               |
| 28 | $E_{V_{max}}$       | 58520         | 2926                 | 11.5                    |               | 32.1                     |               |
| 29 | $E_{K_O}$           | 35948         | 1797                 | 0.3                     |               | 1.1                      |               |
| 30 | $E_{K_C}$           | 59356         | 2967                 | 3.7                     |               | 12.9                     |               |

|    |                   |        |        |      |      |
|----|-------------------|--------|--------|------|------|
| 31 | $E_k$             | 50967  | 2548   | <0.1 | <0.1 |
| 32 | $\alpha_q$        | 0.28   | 0.014  | 8.4  | 25.7 |
| 33 | $\alpha_i$        | 0.04   | 0.002  | 1.9  | 17.4 |
| 34 | $K_C$             | 460e-6 | 23e-6  | 2.8  | 7.6  |
| 35 | $K_O$             | 0.33   | 0.0165 | 0.4  | 1.1  |
| 36 | gt                | 1.7e-6 | 8.5e-8 | 3.6  | 10.2 |
| 37 | $\tilde{\Lambda}$ | 5      | 0.25   | 10.8 | 36.6 |
| 38 | $T_\phi$          | 10     | 0.5    | 15.0 | 47.2 |
| 39 | $T_\phi$          | 10     | 0.5    | 24.4 | 48.4 |
| 40 | $T_\phi$          | 8      | 0.5    | 4.7  | 31.8 |
| 41 | $T_\phi$          | 2      | 0.5    | 52.0 | 71.9 |
| 42 | $T_\phi$          | 15     | 1      | 55.9 | 70.5 |
| 43 | $T_r$             | 2      | 0.1    | 3.6  | 25.1 |
| 44 | $T_r$             | 2      | 0.1    | 1.2  | 5.1  |
| 45 | $T_r$             | 0.5    | 0.1    | 15.8 | 50.6 |
| 46 | $t_c$             | 10.5   | 0.5    | 40.3 | 59.2 |
| 47 | $t_r$             | 0.5    | 0.1    | 2.1  | 15.8 |
| 48 | $\xi$             | 0.5    | 0.1    | 25.9 | 51.1 |
| 49 | $k_L$             | 0.1    | 0.05   | 66.0 | 82.8 |
| 50 | $k_L$             | 3e-3   | 0.5e-3 | 18.4 | 52.1 |
| 51 | $\tau_W$          | 180    | 60     | 62.6 | 81.2 |
| 52 | $\tau_W$          | 90     | 30     | 43.4 | 70.5 |
| 53 | $\tau_W$          | 30     | 15     | 69.5 | 83.8 |
| 54 | $C_{ab}$          | 40     | 20     | 9.1  | 24.3 |
| 55 | $C_{ab}$          | 15     | 20     | 64.6 | 74.5 |
| 56 | $C_{ab}$          | 15     | 20     | 41.4 | 67.3 |
| 57 | $C_{ab}$          | 10     | 20     | 73.4 | 80.7 |
| 58 | $C_{ab}$          | 10     | 20     | 75.9 | 81.1 |
| 59 | $C_{ab}$          | 10     | 20     | 71.2 | 79.8 |
| 60 | $C_{ab}$          | 10     | 20     | 74.9 | 81.3 |
| 61 | $C_{ab}$          | 10     | 20     | 70.1 | 79.1 |
| 62 | $C_{ab}$          | 10     | 20     | 76.0 | 81.5 |
| 63 | $C_{ab}$          | 5      | 20     | 85.2 | 88.5 |
| 64 | $C_{ab}$          | 10     | 20     | 75.1 | 80.9 |
| 65 | $C_{ab}$          | 10     | 20     | 57.9 | 77.0 |

|    |           |       |       |      |      |
|----|-----------|-------|-------|------|------|
| 66 | $C_{ab}$  | 20    | 20    | 58.4 | 68.4 |
| 67 | $C_{dm}$  | 0.012 | 0.002 | <0.1 | 0.1  |
| 68 | $C_{sm}$  | 0     | 0.01  | 0.3  | 2.1  |
| 69 | $LIDFa$   | -0.35 | 0.1   | 24.1 | 42.2 |
| 70 | $LIDFb$   | -0.15 | 0.1   | 16.0 | 46.8 |
| 71 | hc        | 1     | 0.5   | 9.8  | 34.5 |
| 72 | leafwidth | 0.1   | 0.01  | 0.3  | 0.8  |

*Acknowledgements.* A. Norton was partly supported by an Australian Postgraduate Award provided by the Australian Government and a CSIRO OCE Scholarship. The research was funded, in part, by the ARC Center of Excellence for Climate System Science (grant CE110001028).

## References

- Baldocchi, D., Ryu, Y., and Keenan, T.: Terrestrial Carbon Cycle Variability, *F1000Research*, 5, 2371, doi:10.12688/f1000research.8962.1, <http://f1000research.com/articles/5-2371/v1>, 2016.
- Baldocchi, D. D.: 'Breathing' of the terrestrial biosphere: lessons learned from a global network of carbon dioxide flux measurement systems, *Australian Journal of Botany*, 56, 1–26, doi:10.1071/BT07151, <http://www.publish.csiro.au/?paper=BT07151>, 2008.
- Beer, C., Reichstein, M., Tomelleri, E., and Ciais, P.: Terrestrial gross carbon dioxide uptake: global distribution and covariation with climate, *Science*, 329, 834–838, doi:10.1126/science.1184984, 2010.
- Bodman, R. W.: Uncertainty in temperature projections reduced using carbon cycle and climate observations, *Nature Climate Change*, 3, 725–729, doi:10.1038/nclimate1903, <http://dx.doi.org/10.1038/nclimate1903>, 2013.
- Carter, G. A., Freedman, A., Keabian, P. L., and Scott, H. E.: Use of a prototype instrument to detect short-term changes in solar-excited leaf fluorescence, *International Journal of Remote Sensing*, 25, 1779–1784, doi:10.1080/01431160310001619544, <http://www.tandfonline.com/doi/abs/10.1080/01431160310001619544>, 2004.
- Ciais, P., Sabine, C., Bala, G., Bopp, L., Brovkin, V., Canadell, J., Chhabra, A., DeFries, R., Galloway, J., Heimann, M., Jones, C., Le Quéré, C., Myneni, R. B., Piao, S., and Thornton, P.: Carbon and Other Biogeochemical Cycles, in: *Climate Change 2013: The Physical Science Bases. Contribution of Working Group I to the Fifth Assessment Report of the Intergovernmental Panel on Climate Change*, edited by Stocker, T. F., Qin, D., Plattner, G. K., Tignor, M., Allen, S. K., Boschung, J., Nauels, A., Xia, Y., Bex, V., and Midgley, P. M., pp. 465–570, Cambridge University Press, Cambridge, 2013.
- Damm, A., Guanter, L., Paul-Limoges, E., van der Tol, C., Hueni, A., Buchmann, N., Eugster, W., Ammann, C., and Schaepman, M.: Far-red sun-induced chlorophyll fluorescence shows ecosystem-specific relationships to gross primary production: An assessment based on observational and modeling approaches, *Remote Sensing of Environment*, 166, 91–105, doi:10.1016/j.rse.2015.06.004, <http://linkinghub.elsevier.com/retrieve/pii/S0034425715300341>, 2015.
- Daumard, F., Champagne, S., Fournier, A., Goulas, Y., Ounis, A., Hanocq, J.-F., and Moya, I.: A Field Platform for Continuous Measurement of Canopy Fluorescence, *IEEE Transactions on Geoscience and Remote Sensing*, 48, 3358–3368, doi:10.1109/TGRS.2010.2046420, 2010.
- Evans, J. R.: Photosynthesis and nitrogen relationships in leaves of C3 plants, *Oecologia*, 78, 9–19, 1989.
- Flexas, J., Escalona, J. M., and Medrano, H.: Water stress induces different levels of photosynthesis and electron transport rate regulation in grapevines, *Plant, Cell and Environment*, 22, 39–48, doi:10.1046/j.1365-3040.1999.00371.x, <http://doi.wiley.com/10.1046/j.1365-3040.1999.00371.x>, 1999.
- Flexas, J., Briantais, J.-m., Cerovic, Z., Medrano, H., and Moya, I.: Steady-State and Maximum Chlorophyll Fluorescence Responses to Water Stress in Grapevine Leaves: A New Remote Sensing System, *Remote Sensing Environment*, 73, 283–297, doi:10.1016/S0034-4257(00)00104-8, 2000.
- Flexas, J., Escalona, J. M., Evain, S., Gulías, J., Moya, I., Osmond, C. B., and Medrano, H.: Steady-state chlorophyll fluorescence (Fs) measurements as a tool to follow variations of net CO2 assimilation and stomatal conductance during water-stress in C3 plants., *Physiologia plantarum*, 114, 231–240, 2002.

- Frankenberg, C., Fisher, J. B., Worden, J., Badgley, G., Saatchi, S. S., Lee, J.-E., Toon, G. C., Butz, A., Jung, M., Kuze, A., and Yokota, T.: New global observations of the terrestrial carbon cycle from GOSAT: Patterns of plant fluorescence with gross primary productivity, *Geophysical Research Letters*, 38, n/a–n/a, doi:10.1029/2011GL048738, 2011.
- Freedman, A., Cavender-Bares, J., Kebejian, P., Bhaskar, R., Scott, H., and Bazzaz, F.: Remote sensing of solar-excited plant fluorescence as a measure of photosynthetic rate, *Photosynthetica*, 40, 127–132, doi:10.1023/A:1020131332107, 2002.
- Friedlingstein, P., Cox, P., Betts, R., Bopp, L., von Bloh, W., Brovkin, V., Cadule, P., Doney, S., Eby, M., Fung, I., Bala, G., John, J., Jones, C., Joos, F., Kato, T., Kawamiya, M., Knorr, W., Lindsay, K., Matthews, H., Raddatz, T., Rayner, P., Reick, C., Roeckner, E., Schnitzler, K., Schnur, R., Strassmann, K., Weaver, A., Yoshikawa, C., and Zeng, N.: Climate–Carbon Cycle Feedback Analysis: Results from the C 4 MIP Model Intercomparison., ... of Climate, 19, 3337–3353, doi:http://dx.doi.org/10.1175/JCLI3800.1, 2006.
- 10 Guanter, L., Frankenberg, C., Dudhia, A., Lewis, P. E., Gómez-Dans, J., Kuze, A., Suto, H., and Grainger, R. G.: Retrieval and global assessment of terrestrial chlorophyll fluorescence from GOSAT space measurements, *Remote Sensing of Environment*, 121, 236–251, doi:10.1016/j.rse.2012.02.006, http://linkinghub.elsevier.com/retrieve/pii/S0034425712000909, 2012.
- Guanter, L., Rossini, M., Colombo, R., Meroni, M., Frankenberg, C., Lee, J.-E., and Joiner, J.: Using field spectroscopy to assess the potential of statistical approaches for the retrieval of sun-induced chlorophyll fluorescence from ground and space, *Remote Sensing of Environment*, 15 133, 52–61, doi:10.1016/j.rse.2013.01.017, http://linkinghub.elsevier.com/retrieve/pii/S0034425713000357, 2013.
- Guanter, L., Zhang, Y., Jung, M., Joiner, J., Voigt, M., Berry, J. a., Frankenberg, C., Huete, A. R., Zarco-Tejada, P., Lee, J.-E., Moran, M. S., Ponce-Campos, G., Beer, C., Camps-Valls, G., Buchmann, N., Gianelle, D., Klumpp, K., Cescatti, A., Baker, J. M., and Griffis, T. J.: Global and time-resolved monitoring of crop photosynthesis with chlorophyll fluorescence., *Proceedings of the National Academy of Sciences of the United States of America*, 111, E1327–33, doi:10.1073/pnas.1320008111, http://www.ncbi.nlm.nih.gov/pubmed/24706867, 2014.
- 20 Houborg, R., Cescatti, A., Migliavacca, M., and Kustas, W.: Satellite retrievals of leaf chlorophyll and photosynthetic capacity for improved modeling of GPP, *Agricultural and Forest Meteorology*, 177, 10–23, doi:10.1016/j.agrformet.2013.04.006, http://dx.doi.org/10.1016/j.agrformet.2013.04.006http://linkinghub.elsevier.com/retrieve/pii/S016819231300083X, 2013.
- Kaminski, T., Knorr, W., Scholze, M., Gobron, N., Pinty, B., Giering, R., and Mathieu, P.-P.: Consistent assimilation of MERIS FAPAR and atmospheric CO<sub>2</sub> into a terrestrial vegetation model and interactive mission benefit analysis, *Biogeosciences*, 9, 3173–3184, doi:10.5194/bg- 9-3173-2012, 2012.
- 25 Kaminski, T., Knorr, W., Schürmann, G., Scholze, M., Rayner, P. J., Zaehle, S., Blessing, S., Dorigo, W., Gayler, V., Giering, R., Gobron, N., Grant, J. P., Heimann, M., Houweling, S., Kato, T., Kattge, J., Kelley, D., Kemp, S., Koffi, E. N., Köstler, C., Mathieu, P., Pinty, B., Reick, C. H., Rödenbeck, C., Schnur, R., Scipal, K., Sebald, C., Stacke, T., Van, A. T., Vossbeck, M., Widmann, H., and Ziehn, T.: The BETHY/JSBACH Carbon Cycle Data Assimilation System : experiences and challenges, *Journal of Geophysical Research: Biogeosciences*, 118, 1–13, doi:10.1002/jgrg.20118, 2013.
- 30 Kato, S., Loeb, N. G., Rutan, D. A., Rose, F. G., Sun-Mack, S., Miller, W. F., and Chen, Y.: Uncertainty Estimate of Surface Irradiances Computed with MODIS-, CALIPSO-, and CloudSat-Derived Cloud and Aerosol Properties, *Surveys in Geophysics*, 33, 395–412, doi:10.1007/s10712-012-9179-x, 2012.
- Kattge, J., Knorr, W., Raddatz, T., and Wirth, C.: Quantifying photosynthetic capacity and its relationship to leaf nitrogen content for global scale terrestrial biosphere models, *Global Change Biology*, 15, 976–991, doi:10.1111/j.1365-2486.2008.01744.x, http://onlinelibrary.wiley.com/doi/10.1111/j.1365-2486.2008.0, 2009.
- 35 Knorr, W., Kaminski, T., Scholze, M., Gobron, N., Pinty, B., Giering, R., and Mathieu, P.-P.: Carbon cycle data assimilation with a generic phenology model, *Journal of Geophysical Research*, 115, G04 017, doi:10.1029/2009JG001119, 2010.



- Koffi, E. N., Rayner, P. J., Scholze, M., Chevallier, F., and Kaminski, T.: Quantifying the constraint of biospheric process parameters by CO<sub>2</sub> concentration and flux measurement networks through a carbon cycle data assimilation system, *Atmospheric Chemistry and Physics*, 13, 10 555–10 572, doi:10.5194/acp-13-10555-2013, 2013.
- Koffi, E. N., Rayner, P. J., Norton, A. J., Frankenberg, C., and Scholze, M.: Investigating the usefulness of satellite-derived fluorescence data  
5 in inferring gross primary productivity within the carbon cycle data assimilation system, *Biogeosciences*, 12, 4067–4084, doi:10.5194/bg-12-4067-2015, <http://www.biogeosciences.net/12/4067/2015/>, 2015.
- Lee, J.-e., Frankenberg, C., van der Tol, C., Berry, J. A., Guanter, L., Boyce, C. K., Fisher, J. B., Morrow, E., Worden, J. R., Asefi, S., Badgley, G., and Saatchi, S.: Forest productivity and water stress in Amazonia: observations from GOSAT chlorophyll fluorescence., *Proceedings. Biological sciences / The Royal Society*, 280, 20130 171, doi:10.1098/rspb.2013.0171, <http://www.pubmedcentral.nih.gov/articlerender.fcgi?artid=3652436&tool=pmcentrez&rendertype=abstract>, 2013.
- 10 Parazoo, N. C., Bowman, K., Frankenberg, C., Lee, J.-E., Fisher, J. B., Worden, J., Jones, D. B. a., Berry, J., Collatz, G. J., Baker, I. T., Jung, M., Liu, J., Osterman, G., O'Dell, C., Sparks, A., Butz, A., Guerlet, S., Yoshida, Y., Chen, H., and Gerbig, C.: Interpreting seasonal changes in the carbon balance of southern Amazonia using measurements of XCO<sub>2</sub> and chlorophyll fluorescence from GOSAT, *Geophysical Research Letters*, 40, 2829–2833, doi:10.1002/grl.50452, 2013.
- 15 Rayner, P., Scholze, M., Knorr, W., and Kaminski, T.: Two decades of terrestrial carbon fluxes from a carbon cycle data assimilation system (CCDAS), ... *Biogeochemical Cycles*, 19, n/a–n/a, doi:10.1029/2004GB002254, 2005.
- Rossini, M., Nedbal, L., Guanter, L., Ač, A., Alonso, L., Burkart, A., Cogliati, S., Colombo, R., Damm, A., Drusch, M., Hanus, J., Janoutova, R., Julitta, T., Kokkalis, P., Moreno, J., Novotny, J., Panigada, C., Pinto, F., Schickling, A., Schüttemeyer, D., Zemek, F., and Rascher, U.: Red and far red Sun-induced chlorophyll fluorescence as a measure of plant photosynthesis, *Geophysical Research Letters*, 42, 1632–1639,  
20 doi:10.1002/2014GL062943, <http://doi.wiley.com/10.1002/2014GL062943>, 2015.
- Schimel, D., Pavlick, R., Fisher, J. B., Asner, G. P., Saatchi, S., Townsend, P., Miller, C., Frankenberg, C., Hibbard, K., and Cox, P.: Observing terrestrial ecosystems and the carbon cycle from space, *Global Change Biology*, 21, 1762–1776, doi:10.1111/gcb.12822, <http://doi.wiley.com/10.1111/gcb.12822>, 2015.
- Scholze, M., Kaminski, T., Rayner, P., Knorr, W., and Giering, R.: Propagating uncertainty through prognostic carbon cycle data assimilation  
25 system simulations, *Journal of Geophysical Research*, 112, D17 305, doi:10.1029/2007JD008642, 2007.
- Scholze, M., Kaminski, T., Knorr, W., Blessing, S., Vossbeck, M., Grant, J. P., and Scipal, K.: Simultaneous assimilation of SMOS soil moisture and atmospheric CO<sub>2</sub> in-situ observations to constrain the global terrestrial carbon cycle, *Remote Sensing of Environment*, 180, 334–345, doi:10.1016/j.rse.2016.02.058, <http://dx.doi.org/10.1016/j.rse.2016.02.058>, 2016.
- Tarantola, A.: *Inverse Problem Theory and Methods for Model Parameter Estimation*, SIAM, Philadelphia, 2005.
- 30 Van der Tol, C., Verhoef, W., Timmermans, J., Verhoef, A., and Su, Z.: An integrated model of soil-canopy spectral radiances, photosynthesis, fluorescence, temperature and energy balance, *Biogeosciences*, 6, 3109–3129, doi:10.5194/bg-6-3109-2009, 2009.
- Van der Tol, C., Berry, J. A., Campbell, P. K. E., and Rascher, U.: Models of fluorescence and photosynthesis for interpreting measurements of solar-induced chlorophyll fluorescence, *Journal of Geophysical Research: Biogeosciences*, 119, 1–16, doi:10.1002/2014JG002713, 2014.
- 35 Verrelst, J., Rivera, J. P., Tol, C. V. D., Magnani, F., Mohammed, G., and Moreno, J.: Global sensitivity analysis of the SCOPE model: What drives simulated canopy-leaving sun-induced fluorescence ?, *Remote Sensing of Environment*, 166, 8–21, doi:10.1016/j.rse.2015.06.002, <http://dx.doi.org/10.1016/j.rse.2015.06.002>, 2015.

- Walther, S., Voigt, M., Thum, T., Gonsamo, A., Zhang, Y., Koehler, P., Jung, M., Varlagin, A., and Guanter, L.: Satellite chlorophyll fluorescence measurements reveal large-scale decoupling of photosynthesis and greenness dynamics in boreal evergreen forests, *Global Change Biology*, 22, 2979–2996, doi:10.1111/gcb.13200, <http://dx.doi.org/10.1111/gcb.13200><http://doi.wiley.com/10.1111/gcb.13200>, 2016.
- Weedon, G. P., Balsamo, G., Bellouin, N., Gomes, S., Best, M. J., and Viterbo, P.: The WFDEI meteorological forcing data set: WATCH Forcing Data methodology applied to ERA-Interim reanalysis data, *Water Resources Research*, 50, 7505–7514, doi:10.1002/2014WR015638, 2014.
- Wilson, M. and Henderson-Sellers, A.: Global archive of land cover and soils data for use in general-circulation climate models, *International Journal of Climatology*, 5, 119–143, 1985.
- Yang, X., Tang, J., Mustard, J. F., Lee, J.-e., Rossini, M., Joiner, J., Munger, J. W., Kornfeld, A., and Richardson, A. D.: Solar-induced chlorophyll fluorescence that correlates with canopy photosynthesis on diurnal and seasonal scales in a temperate deciduous forest, *Geophysical Research Letters*, 42, 2977–2987, doi:10.1002/2015GL063201, <http://doi.wiley.com/10.1002/2015GL063201>, 2015.
- Zhang, Y., Guanter, L., Berry, J. A., Joiner, J., van der Tol, C., Huete, A., and Gitelson, A.: Estimation of vegetation photosynthetic capacity from space-based measurements of chlorophyll fluorescence for terrestrial biosphere models, *Global Change Biology*, 20, 3727–3742, doi:10.1111/gcb.12664, 2014.
- Zhang, Y., Guanter, L., Berry, J. A., van der Tol, C., Yang, X., Tang, J., and Zhang, F.: Model-based analysis of the relationship between sun-induced chlorophyll fluorescence and gross primary production for remote sensing applications, *Remote Sensing of Environment*, 187, 145–155, doi:10.1016/j.rse.2016.10.016, <http://dx.doi.org/10.1016/j.rse.2016.10.016>, 2016.
- Ziehn, T., Knorr, W., and Scholze, M.: Investigating spatial differentiation of model parameters in a carbon cycle data assimilation system, *Global Biogeochemical Cycles*, 25, 1–13, doi:10.1029/2010GB003886, 2011.
